# Supplementary material for: Foliar Lesions Induced by Pestalotiopsis arengae in Oil Palm (O × G) in the Colombian Southwest Palm Zone
Source: MDPI journal article supplement (doi:10.3390/jof10010024), 2023-12-29
Supplement: s1 [file s1]

Supplementary Materials:

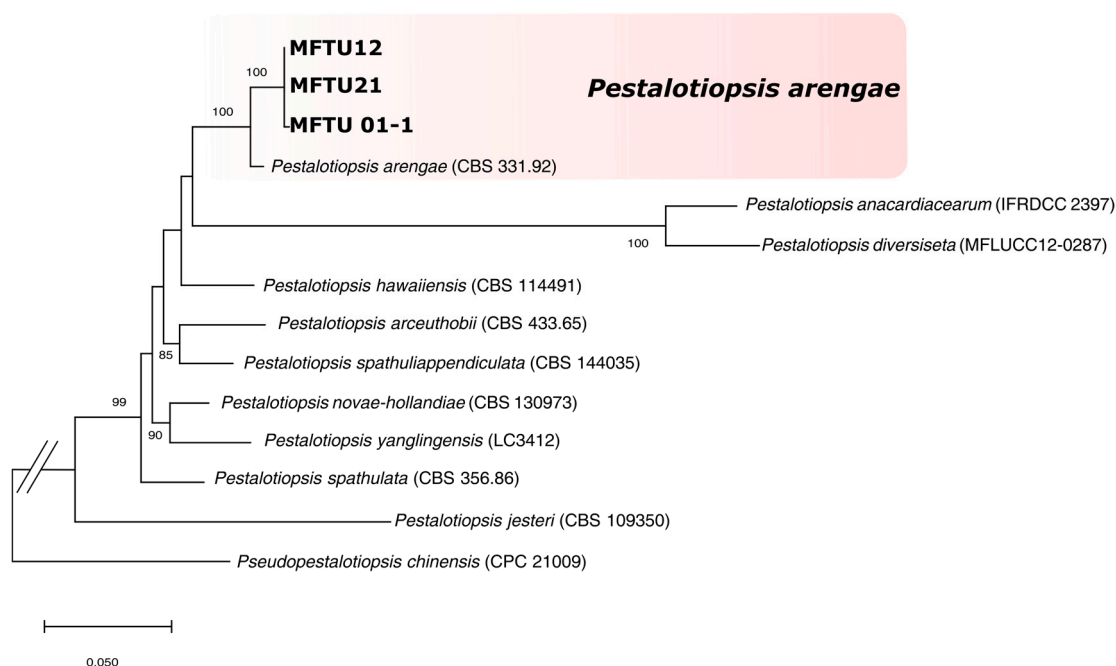

**Supplementary Figure S1.** Phylogenetic tree obtained via maximum likelihood estimation of the consensus of the *ITS* region of some species of the genus *Pestalotiopsis*. The species *Pseudopestalotiopsis chinensis* (CPC 21009) was included as an outgroup.

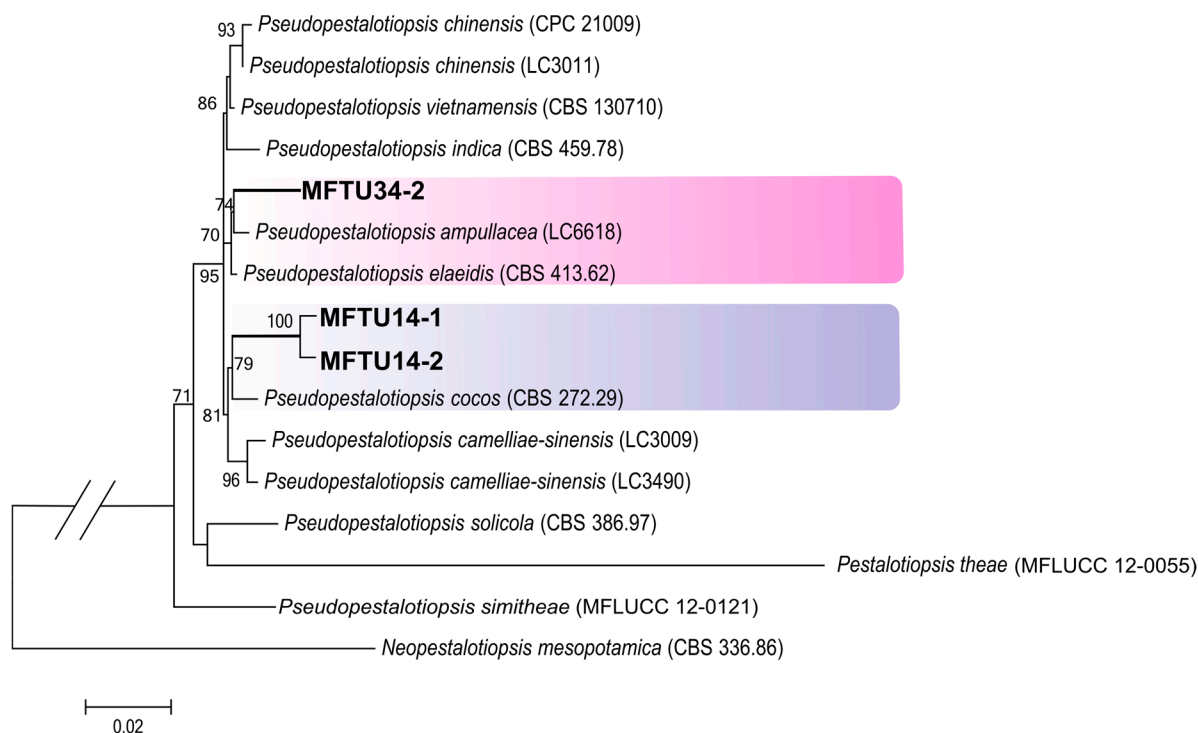

**Supplementary Figure S2.** Phylogenetic tree obtained via maximum likelihood estimation of the consensus of the *ITS* region of some species of the genus *Pseudopestalotiopsis*. The species *Neopestalotiopsis mesopotamica* (CBS 336.86) was included as an outgroup.

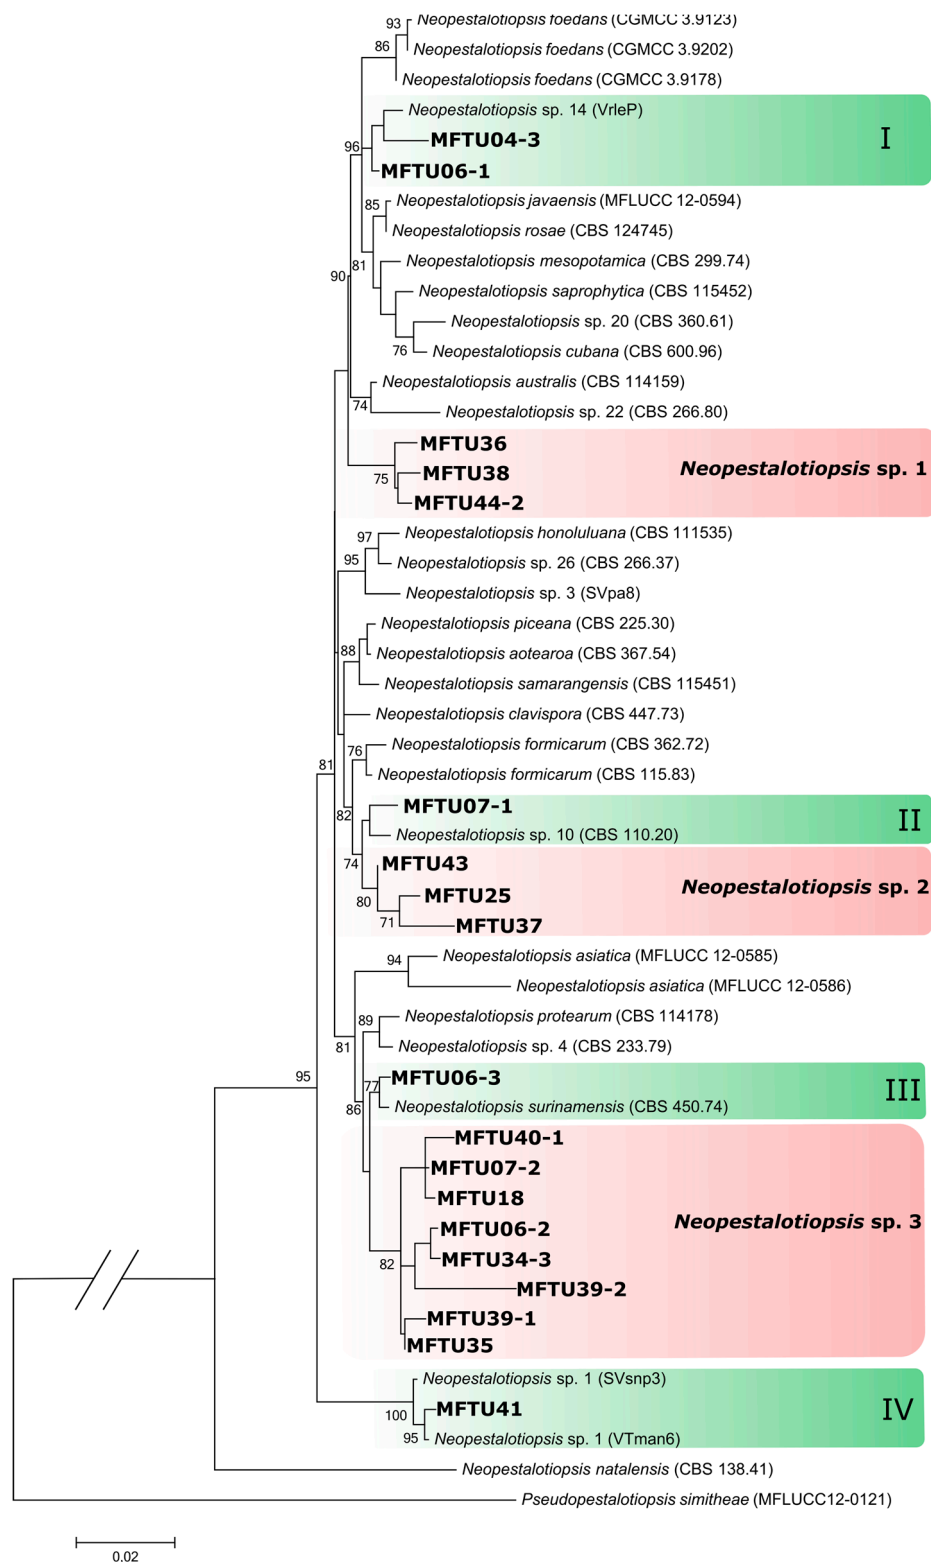

**Supplementary Figure S3.** Phylogenetic tree obtained via maximum likelihood estimation of the consensus of the *ITS* region of some species of the genus *Neopestalotiopsis*. The species *Pseudoestalotiopsis simithae* (MFLUCC12-0121) was included as an outgroup.

**Table S1:** Isolate codes, taxonomic identification, and accession numbers reported in the GenBank used in this study.

| Strain/Isolate | Taxon                                  | GenBank Accession Number | Reference                                                                                                                                                                                     |
|----------------|----------------------------------------|--------------------------|-----------------------------------------------------------------------------------------------------------------------------------------------------------------------------------------------|
| CBS 433.65     | <i>Pestalotiopsis arceuthobii</i>      | MH554046.1               | F. Liu, 2019. <i>Sporocadaceae</i> , a family of coelomycetous fungi with appendage-bearing conidia.                                                                                          |
| CBS:433.65     | <i>P. maculiformans</i>                | MH858655.1               | Vu D., 2019. Large-scale generation and analysis of filamentous fungal DNA barcodes boosts coverage for kingdom fungi and reveals threshold for fungal species and higher taxon delimitation. |
| CBS 331.92     | <i>P. arengae</i>                      | KM199340.1               | Maharachchikumbura et al., 2014. <i>Pestalotiopsis</i> revisited.                                                                                                                             |
| SAUCC230866    | <i>P. portugallica</i>                 | OQ692014                 | Liu S., 2023. Direct submission.                                                                                                                                                              |
| SAUCC230867    | <i>P. portugallica</i>                 | OQ692015.1               | Liu S., 2023. Direct submission.                                                                                                                                                              |
| CBS:236.38     | <i>P. biciliata</i>                    | MK862235.1               | Vu D., 2019. Large-scale generation and analysis of filamentous fungal DNA barcodes boosts coverage for kingdom fungi and reveals threshold for fungal species and higher taxon delimitation. |
| CBS 790.68     | <i>P. biciliata</i>                    | KM199305                 | Maharachchikumbura et al., 2014. <i>Pestalotiopsis</i> revisited.                                                                                                                             |
| CBS:171.26     | <i>P. oryzae</i>                       | MH854881.1               | Vu D., 2019. Large-scale generation and analysis of filamentous fungal DNA barcodes boosts coverage for kingdom fungi and reveals threshold for fungal species and higher taxon delimitation. |
| MWN35          | <i>P. oryzae</i>                       | OM899910                 | Waweru B.N. and Mutiga S., 2022. Direct submission.                                                                                                                                           |
| CBS:176.25     | <i>P. scoparia</i>                     | MH854838.1               | Vu D., 2019. Large-scale generation and analysis of filamentous fungal DNA barcodes boosts coverage for kingdom fungi and reveals threshold for fungal species and higher taxon delimitation. |
| BGTU           | <i>P. scoparia</i>                     | MT186821.1               | Panteleev S. and Baranov O., 2022. Direct submission.                                                                                                                                         |
| CBS 186.71     | <i>P. chamaeropsis</i>                 | KM199326.1               | Maharachchikumbura et al., 2014. <i>Pestalotiopsis</i> revisited.                                                                                                                             |
| CBS 113607     | <i>P. chamaeropsis</i>                 | KM199325                 | Maharachchikumbura et al., 2014. <i>Pestalotiopsis</i> revisited.                                                                                                                             |
| CBS 237.38     | <i>P. chamaeropsis</i>                 | KM199324.1               | Maharachchikumbura et al., 2014. <i>Pestalotiopsis</i> revisited.                                                                                                                             |
| CBS 331.96     | <i>P. papuana</i>                      | NR_147553.1              | Maharachchikumbura et al., 2014. <i>Pestalotiopsis</i> revisited.                                                                                                                             |
| CBS 887.96     | <i>P. papuana</i>                      | KM199318                 | Maharachchikumbura et al., 2014. <i>Pestalotiopsis</i> revisited.                                                                                                                             |
| CBS 115585     | <i>P. diploclisia</i>                  | KM199315.1               | Maharachchikumbura et al., 2014. <i>Pestalotiopsis</i> revisited.                                                                                                                             |
| CBS 115449     | <i>P. diploclisia</i>                  | KM199314                 | Maharachchikumbura et al., 2014. <i>Pestalotiopsis</i> revisited.                                                                                                                             |
| SAUCC230471    | <i>P. diploclisia</i>                  | OQ691988                 | Liu S., 2023. Direct submission.                                                                                                                                                              |
| CBS 336.97     | <i>P. humus</i>                        | KM199317.1               | Maharachchikumbura et al., 2014. <i>Pestalotiopsis</i> revisited.                                                                                                                             |
| CBS 115450     | <i>P. humus</i>                        | KM199319                 | Maharachchikumbura et al., 2014. <i>Pestalotiopsis</i> revisited.                                                                                                                             |
| CBS 111503     | <i>P. australis</i>                    | KM199331.1               | Maharachchikumbura et al., 2014. <i>Pestalotiopsis</i> revisited.                                                                                                                             |
| CBS 114474     | <i>P. australis</i>                    | KM199334                 | Maharachchikumbura et al., 2014. <i>Pestalotiopsis</i> revisited.                                                                                                                             |
| CBS 119350     | <i>P. australis</i>                    | KM199333.1               | Maharachchikumbura et al., 2014. <i>Pestalotiopsis</i> revisited.                                                                                                                             |
| CBS:357.71     | <i>P. neglecta</i>                     | MH860161.1               | Vu D., 2019. Large-scale generation and analysis of filamentous fungal DNA barcodes boosts coverage for kingdom fungi and reveals threshold for fungal species and higher taxon delimitation. |
| LPS-23         | <i>P. neglecta</i>                     | KX355189.1               | Li L., Pan H., and Zhon C., 2016. Direct submission.                                                                                                                                          |
| LWJ86          | <i>P. neglecta</i>                     | MN218809.1               | Padamsee M. and Burgess B.M., 2019. Direct submission.                                                                                                                                        |
| LC6618         | <i>Pseudopestalotiopsis ampullacea</i> | KX895025.1               | F. Liu, 2017. <i>Pestalotiopsis</i> and allied genera from Camellia, with description of 11 new species from China.                                                                           |
| TXYLBj6        | <i>Ps. camelliae-sinensis</i>          | MN198157.1               | Liu, 2019. Identification and pathogenicity analysis of pathogenic fungi of tea plant.                                                                                                        |
| CLBB1          | <i>Ps. camelliae-sinensis</i>          | MK909901.1               | Liu, 2019. Identification and pathogenicity analysis of pathogenic fungi of tea plant.                                                                                                        |
| TXYLBj4        | <i>Ps. camelliae-sinensis</i>          | MN198155.1               | Liu, 2019. Identification and pathogenicity analysis of pathogenic fungi of tea plant.                                                                                                        |
| NTUCC 18-066   | <i>Ps. chinensis</i>                   | MT322083.1               | Tsai I. and Ariyawansa H.A., 2020. Direct Submission.                                                                                                                                         |
| NTUCC 18-061   | <i>Ps. chinensis</i>                   | MT322078.1               | Tsai I. and Ariyawansa H.A., 2020. Direct Submission.                                                                                                                                         |
| NTUCC 18-056   | <i>Ps. chinensis</i>                   | MT322073.1               | Tsai I. and Ariyawansa H.A., 2020. Direct Submission.                                                                                                                                         |
| CBS 272.29     | <i>Ps. cocos</i>                       | NR_145246                | Maharachchikumbura et al., 2014. <i>Pestalotiopsis</i> revisited.                                                                                                                             |
| CZ-4           | <i>Neopestalotiopsis chrysea</i>       | MT459336.1               | Wu F., 2020. Direct Submission.                                                                                                                                                               |
| MFLUCC 12-0585 | <i>N. asiatica</i>                     | KX816923.1               | Maharachchikumbura, 2017. Characterization of <i>Neopestalotiopsis</i> , <i>Pestalotiopsis</i> , and <i>Truncatella</i> species associated with grapevine trunk diseases in France.           |
| CBS 114159     | <i>N. australis</i>                    | KM199348.1               | Maharachchikumbura et al., 2014. <i>Pestalotiopsis</i> revisited.                                                                                                                             |
| MFLUCC 17-1555 | <i>N. brachiata</i>                    | MK764274.1               | Norphanphoun C. et al., 2019. Morphological and phylogenetic characterization of novel <i>pestalotiopsis</i> species associated with mangroves in Thailand.                                   |

|                |                           |             |                                                                                                                                                                                               |
|----------------|---------------------------|-------------|-----------------------------------------------------------------------------------------------------------------------------------------------------------------------------------------------|
| CBS 447.73     | <i>N. clavispora</i>      | MH860736.1  | Vu D., 2019. Large-scale generation and analysis of filamentous fungal DNA barcodes boosts coverage for kingdom fungi and reveals threshold for fungal species and higher taxon delimitation. |
| YZM-1          | <i>N. clavispora</i>      | OM721785.1  | Lin Q., 2022. Direct Submission.                                                                                                                                                              |
| CBS 600.96     | <i>N. cubana</i>          | KM199347.1  | Maharachchikumbura et al., 2014. <i>Pestalotiopsis</i> revisited.                                                                                                                             |
| KACC48638      | <i>N. foedans</i>         | MK396465.1  | Park H. and Eom A., 2019. Direct Submission.                                                                                                                                                  |
| COUFAL0244     | <i>N. foedans</i>         | MT605379.1  | Barbosa T.J.A et al., 2020. First report of <i>Neopestalotiopsis foedans</i> causing pestalotia spot in leaf on coconut palm in Brazil, Barbosa.                                              |
| CBS 115.83     | <i>N. formicarum</i>      | KM199344.1  | Maharachchikumbura et al., 2014. <i>Pestalotiopsis</i> revisited.                                                                                                                             |
| JSNJ6B         | <i>N. formicarum</i>      | MW578369.1  | Liu C., 2021. First Report of Leaf Spot Disease Caused by <i>Neopestalotiopsis formicarum</i> on <i>Acer negundo</i> .                                                                        |
| ZHKUCC:22-0114 | <i>N. fragariae</i>       | ON651145.1  | Prematunga C.J. et al., 2022. Addition to pestalotioid fungi in China: <i>Neopestalotiopsis fragariae</i> sp. nov. causing leaf spots on <i>Fragaria x ananassa</i> .                         |
| CBS 257.31     | <i>N. javaensis</i>       | MH855207.1  | Vu D., 2019. Large-scale generation and analysis of filamentous fungal DNA barcodes boosts coverage for kingdom fungi and reveals threshold for fungal species and higher taxon delimitation. |
| CBS 111535     | <i>N. honoluluana</i>     | KM199363.1  | Maharachchikumbura et al., 2014. <i>Pestalotiopsis</i> revisited.                                                                                                                             |
| MFLUCC 22-0149 | <i>N. hydeana</i>         | OP802386.1  | Seifollahi E., 2023. Taxonomic Advances from Fungal Flora Associated with Ferns and Fern-like Hosts in Northern Thailand.                                                                     |
| CBS 299.74     | <i>N. mesopotamica</i>    | KM199361.1  | Maharachchikumbura et al., 2014. <i>Pestalotiopsis</i> revisited.                                                                                                                             |
| CBS 336.86     | <i>N. mesopotamica</i>    | NR_145244.1 | Maharachchikumbura et al., 2014. <i>Pestalotiopsis</i> revisited.                                                                                                                             |
| BRIP 66617     | <i>N. nebuloides</i>      | OM417249.1  | Steinrucken T.V. and Tan Y.P., 2020. Diversity of fungal species associated with Clade A <i>Sporobolus</i> species in Queensland, Australia.                                                  |
| BRIP 71166     | <i>N. nebuloides</i>      | OM417308.1  | Steinrucken T.V. and Tan Y.P., 2020. Diversity of fungal species associated with Clade A <i>Sporobolus</i> species in Queensland, Australia.                                                  |
| MFLUCC 17-1738 | <i>N. petila</i>          | MK764276.1  | Norphanphoun C. et al., 2019. Morphological and phylogenetic characterization of novel pestalotioid species associated with mangroves in Thailand.                                            |
| CBS 225.30     | <i>N. piceana</i>         | MH855130.1  | Vu D., 2019. Large-scale generation and analysis of filamentous fungal DNA barcodes boosts coverage for kingdom fungi and reveals threshold for fungal species and higher taxon delimitation. |
| CBS 254.32     | <i>N. piceana</i>         | KM199372.1  | Maharachchikumbura et al., 2014. <i>Pestalotiopsis</i> revisited.                                                                                                                             |
| CBS 394.48     | <i>N. piceana</i>         | KM199368.1  | Maharachchikumbura et al., 2014. <i>Pestalotiopsis</i> revisited.                                                                                                                             |
| MFLUCC 22-0157 | <i>N. phangngaensis</i>   | OP802390.1  | Seifollahi E., 2023. Taxonomic Advances from Fungal Flora Associated with Ferns and Fern-like Hosts in Northern Thailand.                                                                     |
| CBS 114178     | <i>N. protearum</i>       | LT853103.1  | Bonthond G. et al., 2017. Taxonomy of the phytopathogenic genus <i>Seiridium</i> (Sporocadaceae).                                                                                             |
| OTTR524        | <i>N. protearum</i>       | KT936426.1  | Monclova-Santana C. et al., 2015. Pathogenic threats of ten endangered plant species of the karst region of Puerto Rico.                                                                      |
| CBS 115451     | <i>N. samarangensis</i>   | KM199365.1  | Maharachchikumbura et al., 2014. <i>Pestalotiopsis</i> revisited.                                                                                                                             |
| CBS 115452     | <i>N. saprophytica</i>    | KM199345.1  | Maharachchikumbura et al., 2014. <i>Pestalotiopsis</i> revisited.                                                                                                                             |
| CBS 450.74     | <i>N. surinamensis</i>    | NR_145240.1 | Maharachchikumbura et al., 2014. <i>Pestalotiopsis</i> revisited.                                                                                                                             |
| MFLUCC 17-1550 | <i>N. rhizophorae</i>     | MK764278.1  | Norphanphoun C. et al., 2019. Morphological and phylogenetic characterization of novel pestalotioid species associated with mangroves in Thailand.                                            |
| MFLUCC 17-1551 | <i>N. rhizophorae</i>     | MK764277.1  | Norphanphoun C., 2019. Morphological and phylogenetic characterization of novel pestalotioid species associated with mangroves in Thailand.                                                   |
| MFLUCC 17-1728 | <i>N. rhizophorae</i>     | MN871770.1  | Hyde K.D., Norphanphoun C., and Maharachchikumbur S.S., 2019. Refined families of Sodiariomycetes.                                                                                            |
| MFLUCC 17-1745 | <i>N. sonneratae</i>      | MK764280.1  | Norphanphoun C. et al., 2019. Morphological and phylogenetic characterization of novel pestalotioid species associated with mangroves in Thailand.                                            |
| MFLUCC 17-1744 | <i>N. sonneratae</i>      | MK764280.1  | Norphanphoun C. et al., 2019. Morphological and phylogenetic characterization of novel pestalotioid species associated with mangroves in Thailand.                                            |
| KoRLI047182    | <i>N. rosae</i>           | MN341550.1  | Oh S.Y. et al., 2019. Diversity and distribution patterns of endolichenic fungi in Jeju Island, South Korea.                                                                                  |
| JZB340069      | <i>N. rosae</i>           | MN495977.1  | Li Xh and Yan Jy, 2019. Strawberry Root Rot Caused by <i>Neopestalotiopsis rosae</i> in China.                                                                                                |
| JZB340064      | <i>N. rosae</i>           | MN495972.1  | Li Xh and Yan Jy, 2019. Strawberry Root Rot Caused by <i>Neopestalotiopsis rosae</i> in China.                                                                                                |
| CBS 124745     | <i>N. rosae</i>           | KM199360.1  | Maharachchikumbura et al., 2014. <i>Pestalotiopsis</i> revisited.                                                                                                                             |
| 1-22           | <i>N. vaccinii</i>        | OQ316613.1  | Blagojevic J. et al., 2023. Characterization of Fungal Species Associated with Blueberry Dieback in Serbia.                                                                                   |
| 2-21           | <i>N. vaccinii</i>        | OQ316612.1  | Blagojevic J. et al., 2023. Characterization of Fungal Species Associated with Blueberry Dieback in Serbia.                                                                                   |
| KC005788       | <i>Seiridium phylicae</i> | NR_158886   | Crous P.W. et al., 2012. Fungal Planet description sheets: 107-127.                                                                                                                           |



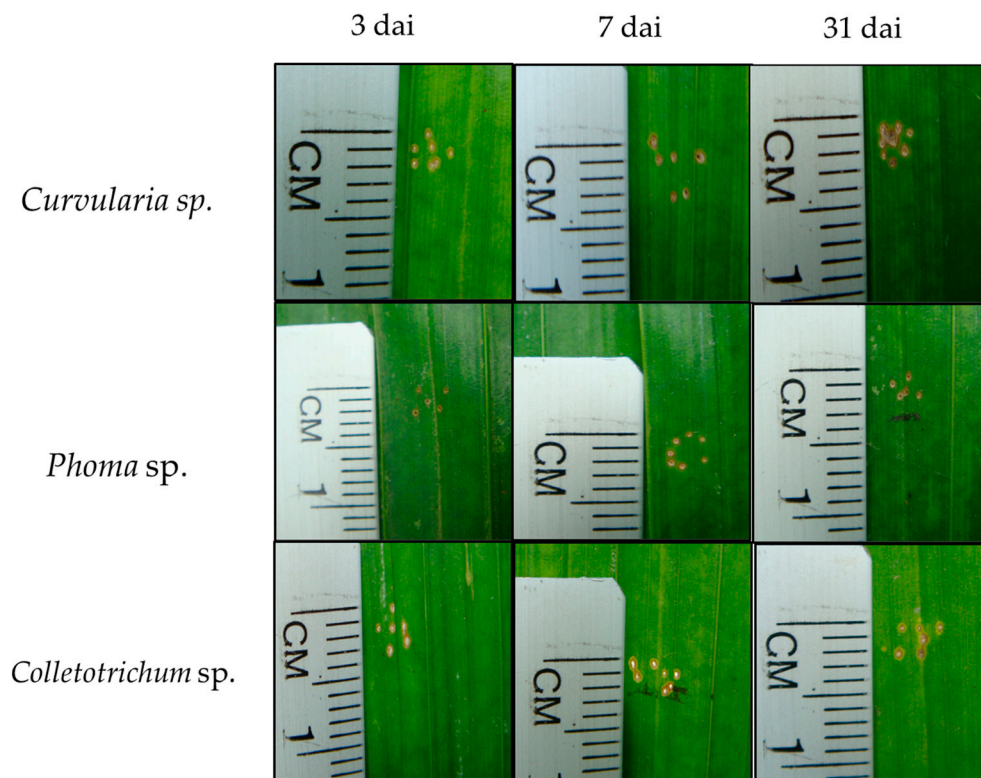

**Supplementary Figure S4.** Pathogenicity test of *Curvularia* sp., *Phoma* sp., and *Colletotrichum* sp. leaf spot after inoculation, from left to right, at 3, 17, and 31 days after inoculation.

#### Methodology for inoculation of isolates on other cultivars

To confirm the pathogenicity of the 25 isolates related to *Pestalotiopsis* in other cultivars, palms of the cultivars aged 5–7 months were inoculated: Brazil × 7 pollen africans, Coari × La Mé and Manaus × Compacta. The inoculation method was the same as that used for the Sinú (cerete) × Deli Yangambi cultivar. A sterile entomological pin (0.40 mm × 37 mm) was used to create the wound in the leaf tissue and 25 mL of a suspension of conidia from each isolate was applied at a concentration of  $3 \times 10^6$  conidia/mL (62). Conidia were taken from 10-day-old Petri dishes. The same procedure was used for the control treatment and autoclaved sterile water was used. Measurements were analyzed using ImageJ® software. The photographic record was taken at 21 days. A total of five repetitions were carried out for each isolate, and a palm with four lanceolate leaves with four wounds and inoculation constituted one repetition. Lesion size (mm<sup>2</sup>) was measured at 3, 7, and 21 days post-inoculation (dai) and analyzed using repeated measures analysis (RM-ANOVA). Means were analyzed using Tukey's test ( $P < 0.05$ ) using the SAS 9.0 statistical program.

Pathogenicity test of 25 isolates on the Brazil x 7 pollen africans cultivar.

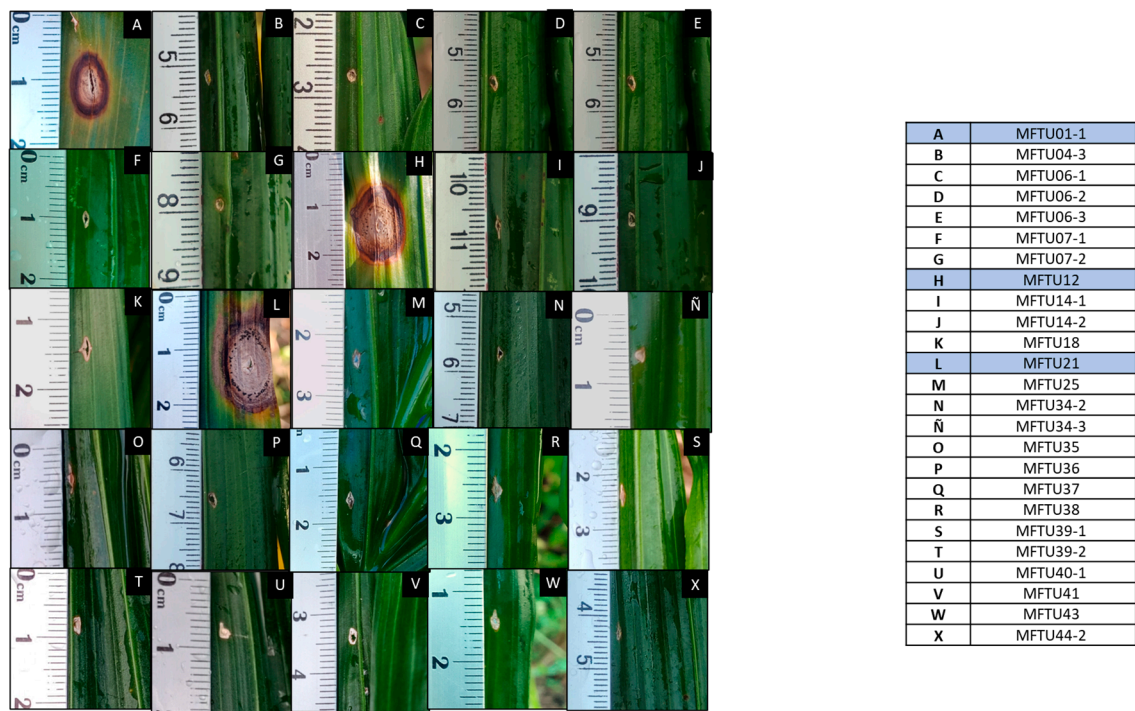

Supplementary Figure S5. Pathogenicity test of the 25 isolates related to *Pestalotiopsis* in cultivar Brazil x 7 pollen africans. The photos were taken 21 days after inoculation, representing isolates A-X as listed in Table 1.

Pathogenicity test of 25 isolates on the Coarí x La Mé cultivar.

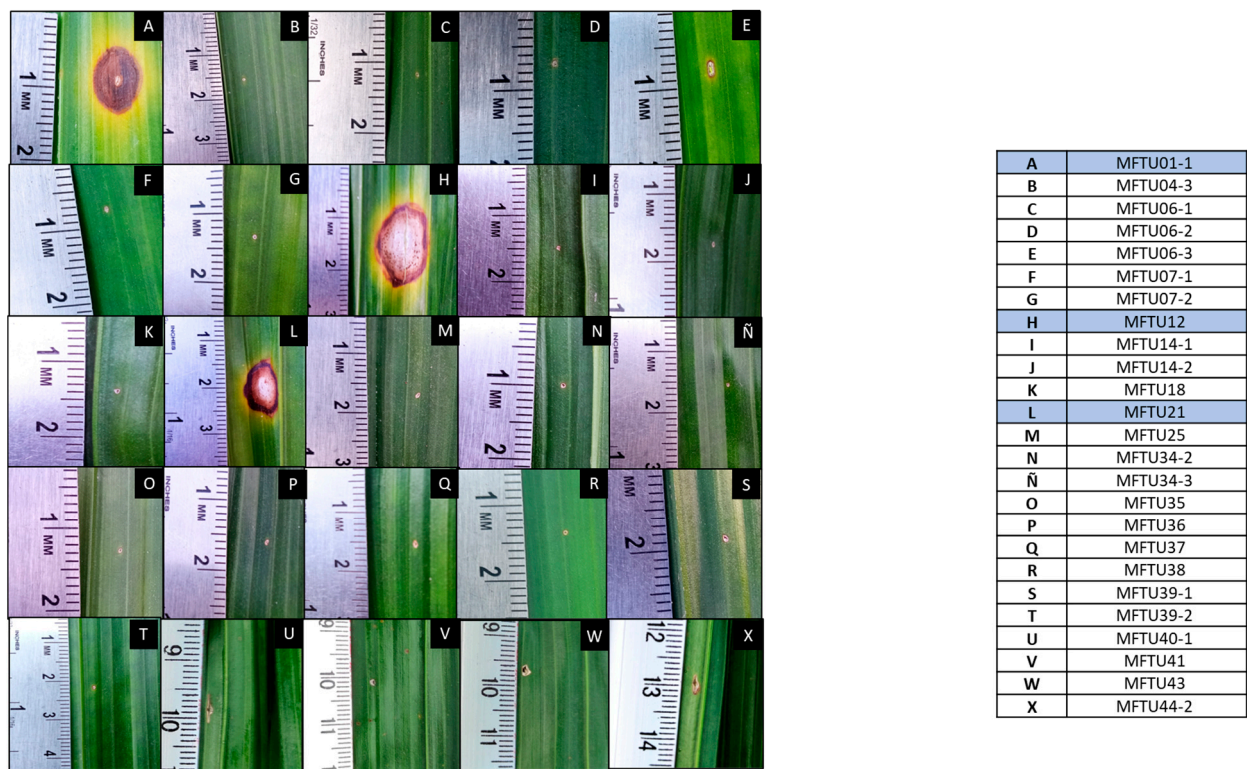

Supplementary Figure S6. Pathogenicity test of the 25 isolates related to *Pestalotiopsis* in cultivar Coarí x La Mé. The photos were taken 21 days after inoculation, representing isolates A-X as listed in Table 1.



Pathogenicity test of 25 isolates on the Manaos x Compacta cultivar.

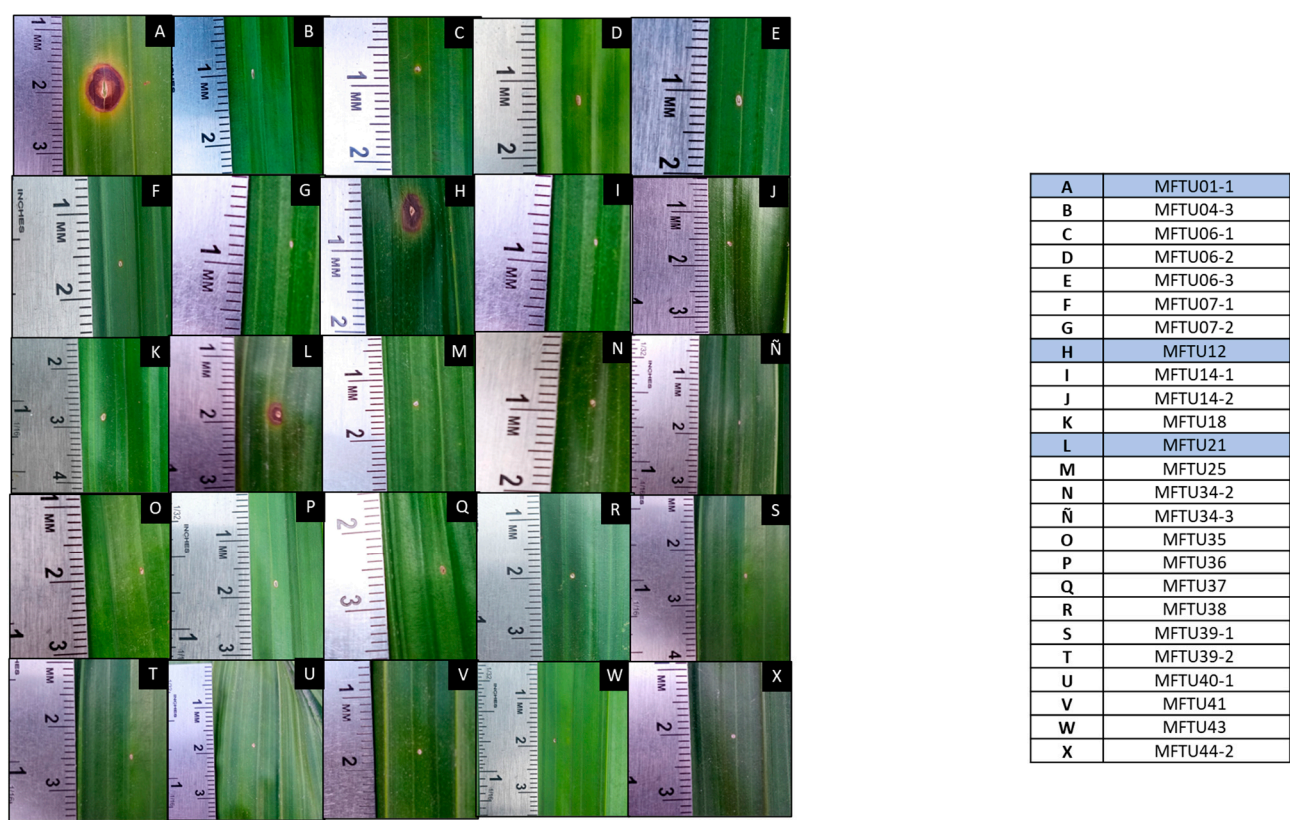

Supplementary Figure S7. Pathogenicity test of the 25 isolates related to *Pestalotiopsis* in cultivar Manaos x Compacta. The photos were taken 21 days after inoculation, representing isolates A-X as listed in Table 1.

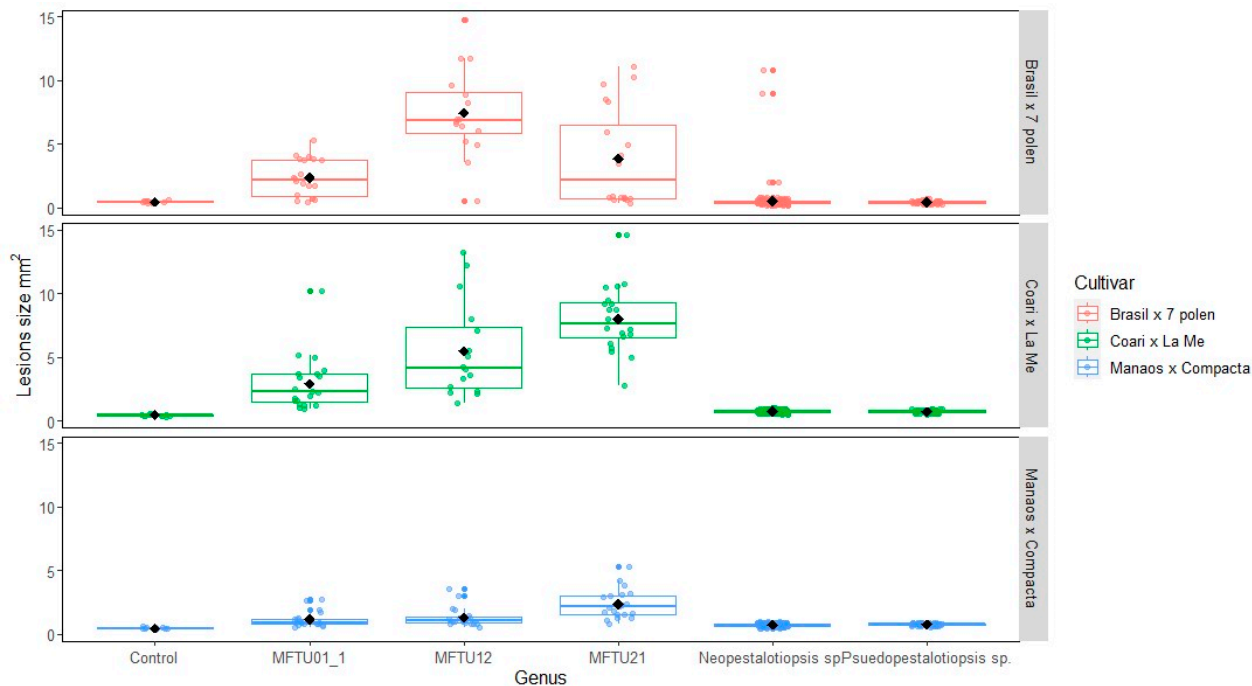

Supplementary Figure S8. The average size of lesions induced via inoculation with isolates of the genera *Pestalotiopsis*, *Neopestalotiopsis*, and *Pseudopestalotiopsis* in the cultivars (Brazil x 7 pollen africans, Coari x La Mé, and Manaos x Compacta). ANOVA and comparisons between treatments were conducted using Tukey's test ( $\alpha < 0.05$ ).
